# Supplementary material for: Large scale production of biomass-derived N-doped porous carbon spheres for oxygen reduction and supercapacitors
Source: Royal Society of Chemistry journal article supplement (doi:10.1039/c3ta14281g), 2013-11-29
Supplement: c3ta14281g.pdf [file c3ta14281g.pdf]

## Electronic Supplementary Information

# Large Scale Production of Biomass-Derived N-Doped Porous Carbon Spheres for Oxygen Reduction and Supercapacitor

Shuyan Gao, Yanli Chen, Hao Fan, Xianjun Wei, Chuangang Hu, Hongxia Luo, and Liangti Qu

Koutecky-Levich (K-L) plots were analyzed at a rate of 10 mV/s at RDE experiment with varying rotating speed from 400 rpm to 2025 rpm at various electrode potentials (vs. Hg/HgO). The electron transfer number ( $n$ ) is calculated by the slopes of K-L plots and the Equations are as follows:

$$\frac{1}{j} = \frac{1}{j_L} + \frac{1}{j_K} = \frac{1}{B\omega^{\frac{1}{2}}} + \frac{1}{j_K} \quad (1)$$

$$B = 0.2nF(D_{O_2})^{\frac{2}{3}}\nu^{\frac{-1}{6}}C_{O_2} \quad (2)$$

where  $j$  is the experimentally measured current density,  $j_L$  is the diffusion-limiting current density,  $j_K$  is the kinetic current density,  $\omega$  is the angular frequency of the rotation in terms of  $\text{rad}\cdot\text{s}^{-1}$ ,  $n$  is the overall number of transferred electrons during  $\text{O}_2$  reduction,  $F$  is the Faraday constant (96485 C/mol),  $D_{O_2}$  is the diffusion coefficient of  $\text{O}_2$  in 0.1M KOH ( $1.9\times 10^{-5} \text{ cm}^2/\text{s}$ ),  $\nu$  is the kinematic viscosity ( $0.01 \text{ cm}^2/\text{s}$ ) of the electrolyte solution, and  $C_{O_2}$  is the bulk concentration of  $\text{O}_2$  ( $1.2\times 10^{-6} \text{ mol}/\text{cm}^3$ ). The constant 0.2 is adopted when the rotation speed is expressed in rpm.

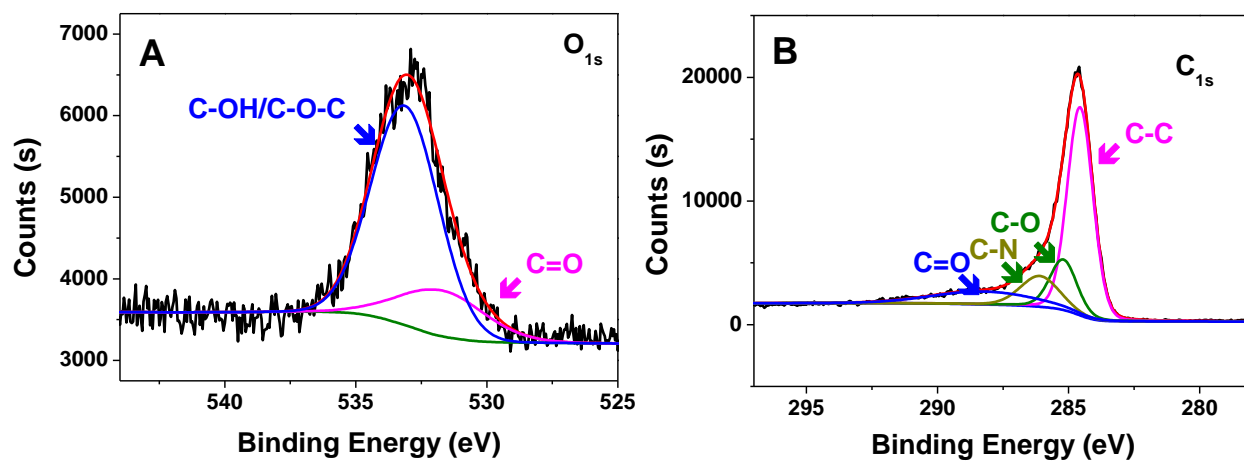

**Fig. S1.** High resolution  $O_{1s}$  (A) and  $C_{1s}$  (B) spectra of N-CSs.

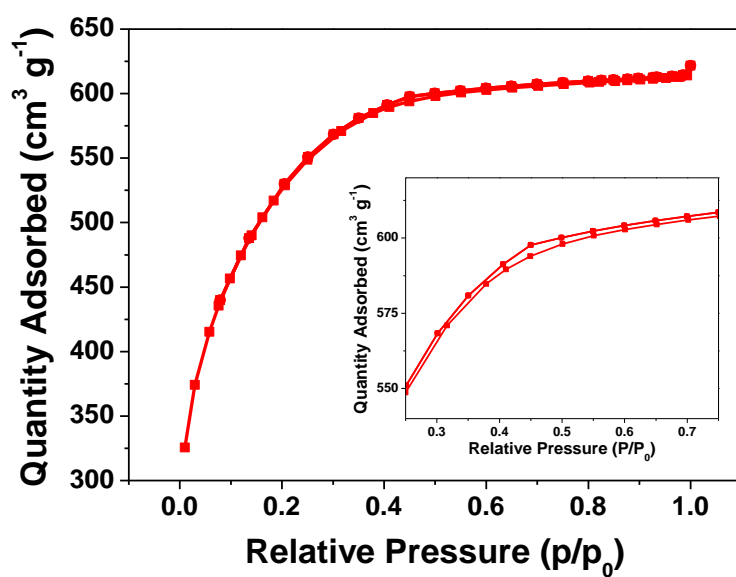

**Fig. S2.**  $\text{N}_2$  sorption isotherms of samples N-CSs.

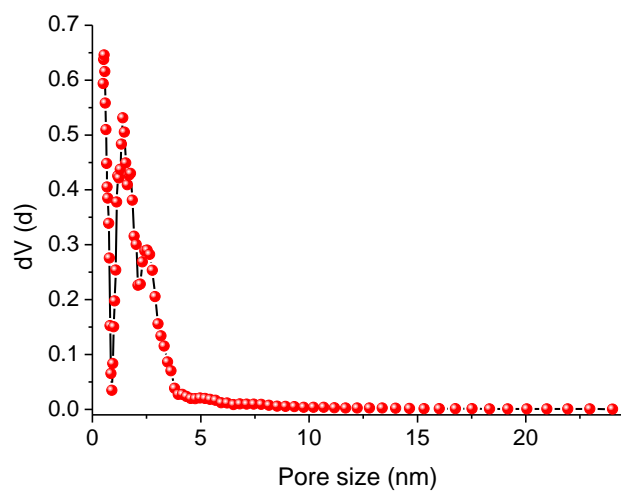

**Fig. S3.** Pore size distribution of N-CSs.

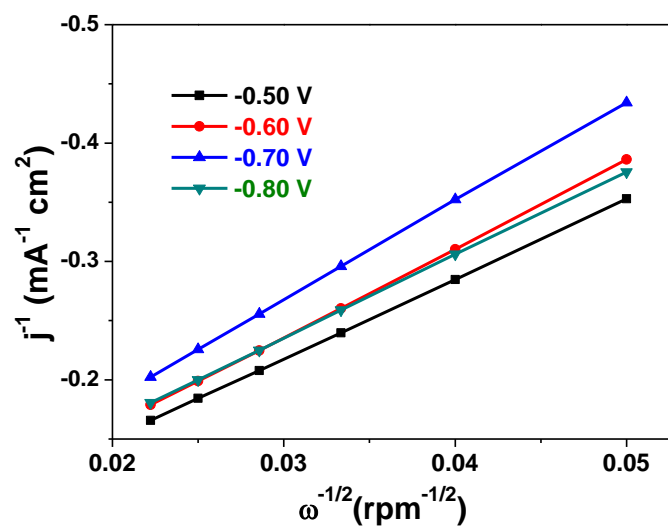

**Fig. S4.** The partial K–L plots derived from the RDE measurements of the commercial Pt/C.

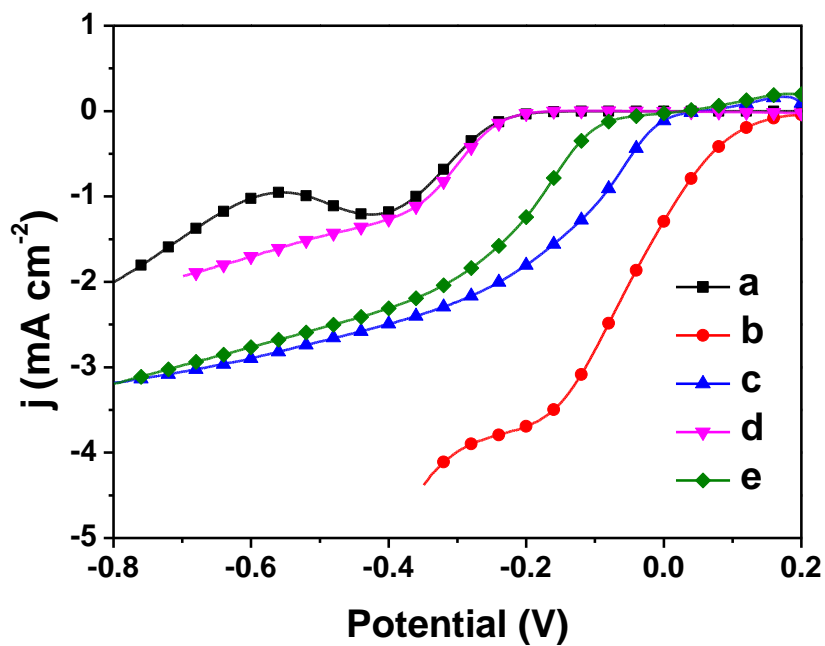

**Fig. S5.** RDE curves for bare-GCE (a), Pt/C (b), N-CSs (c), the directly carbonized products of fermented rice (d), and the directly carbonized products of unfermented rice (e) in O<sub>2</sub>-saturated 0.1 M KOH with rotation speed of 1600 rpm. Scan rate: 10 mV s<sup>-1</sup>.

**Table S1.** Structure character and elemental composition of N-CSs prepared with a pyrolysis temperature of 500 °C, 600 °C, and 800 °C, respectively.

| Sample | $S_{\text{BET}}^{\text{a)}$       | $S_{\text{Mic}}^{\text{b)}$       | $S_{\text{Mec}}^{\text{c)}$       | Pore                               | At.% <sup>e)</sup> |       |       |
|--------|-----------------------------------|-----------------------------------|-----------------------------------|------------------------------------|--------------------|-------|-------|
|        | [m <sup>2</sup> g <sup>-1</sup> ] | [m <sup>2</sup> g <sup>-1</sup> ] | [m <sup>2</sup> g <sup>-1</sup> ] | Volumes <sup>d)</sup>              | C                  | N     | O     |
|        |                                   |                                   |                                   | [cm <sup>3</sup> g <sup>-1</sup> ] |                    |       |       |
| S-500  | 3998.4                            | 2825.8                            | 1172.7                            | 1.2317                             | 78.71              | 10.06 | 11.23 |
| S-600  | 2211.0                            | 1794.28                           | 416.6720                          | 0.8377                             | 82.17              | 8.09  | 9.74  |
| S-800  | 1844.1                            | 1555.98                           | 288.1243                          | 0.7327                             | 87.66              | 5.27  | 7.07  |

a) Specific surface area from multiple BET method; b) Micropore surface area from t-plot method; c) t-method external surface area ( $S_{\text{Mes}}=S_{\text{BET}} - S_{\text{Mic}}$ ); d) Total pore volume at  $p/p_0= 0.99$ ; e) Atomic ratio data from XPS analyses.
